# Supplementary material for: Randomised controlled trial targeting habit formation to improve medication adherence to daily oral medications in patients with gout
Source: HighWire-hosted journal article supplement (doi:10.1136/bmjopen-2021-055930), 2021-11-01
Supplement: bmjopen-2021-055930supp002_data_supplement.pdf [file bmjopen-2021-055930supp002_data_supplement.pdf]

## Cue Text Messages

| Text ID | Timeline                                                        | Adherence measured over | Text Message                                                                                                                                                                                                                     |
|---------|-----------------------------------------------------------------|-------------------------|----------------------------------------------------------------------------------------------------------------------------------------------------------------------------------------------------------------------------------|
| 0       | Day 0                                                           | NA                      | Hi from Brigham and Women's Hospital's medication study! As a reminder, you planned to take your medication when [cue]. [1/2]<br><br>If you haven't put your medications near your [cue location], now may be a good time. [2/2] |
| 1       | Day + 4 or first time patient's 4-day adherence falls under 75% | 4 days                  | When you [cue], remember to take your medication.                                                                                                                                                                                |
| 2       | Text 1 + 4 days with PDC $\leq$ 75%                             | 4 days                  | You put your medication [location]. Don't forget to take them when you [cue].                                                                                                                                                    |
| 3       | Text 2 + 4 days with PDC $\leq$ 75%                             | 4 days                  | You put your medication [location] as a reminder to take them. Is there another activity that would be a better reminder for you? If so, let us know.                                                                            |
| 4       | Text 3 + 4 days with PDC $\leq$ 75%                             | 4 days                  | Remember to take your medication when you are [same cue or new cue].                                                                                                                                                             |
| 5       | Text 4 + 4 days with PDC $\leq$ 75%                             | 4 days                  | When you [cue], remember to take your medication.                                                                                                                                                                                |
| 6       | Text 5 + 4 days with PDC $\leq$ 75%                             | 4 days                  | You put your medication [location]. Don't forget to take them when you [cue].                                                                                                                                                    |
| 7       | Text 6 + 4 days with PDC $\leq$ 75%                             | 4 days                  | Remember to take your medication when you are [same cue or new cue].                                                                                                                                                             |
| 8       | Text 7 + 4 days with PDC $\leq$ 75%                             | 4 days                  | When you [cue], remember to take your medication.                                                                                                                                                                                |
| 9       | Text 8 + 4 days with PDC $\leq$ 75%                             | 4 days                  | You put your medication [location]. Don't forget to take them when you [cue].                                                                                                                                                    |
| 10      | Text 9 + 4 days with PDC $\leq$ 75%                             | 4 days                  | Remember to take your medication when you are [same cue or new cue].                                                                                                                                                             |
| 11      | Text 10 + 4 days with PDC $\leq$ 75%                            | 4 days                  | When you [cue], remember to take your medication.                                                                                                                                                                                |
| 12      | Text 11 + 4 days with PDC $\leq$ 75%                            | 4 days                  | You put your medication [location]. Don't forget to take them when you [cue].                                                                                                                                                    |
| 13      | Text 12 + 4 days with PDC $\leq$ 75%                            | 4 days                  | Remember to take your medication when you are [same cue or new cue].                                                                                                                                                             |
| 14      | Text 13 + 4 days with PDC $\leq$ 75%                            | 4 days                  | When you [cue], remember to take your medication.                                                                                                                                                                                |

|    |                                      |        |                                                                               |
|----|--------------------------------------|--------|-------------------------------------------------------------------------------|
| 15 | Text 14 + 4 days with PDC $\leq$ 75% | 4 days | You put your medication [location]. Don't forget to take them when you [cue]. |
| 16 | Text 15 + 4 days with PDC $\leq$ 75% | 4 days | Remember to take your medication when you are [same cue or new cue].          |
| 17 | Text 16 + 4 days with PDC $\leq$ 75% | 4 days | When you [cue], remember to take your medication.                             |
| 18 | Text 17 + 4 days with PDC $\leq$ 75% | 4 days | You put your medication [location]. Don't forget to take them when you [cue]. |
| 19 | Text 18 + 4 days with PDC $\leq$ 75% | 4 days | Remember to take your medication when you are [same cue or new cue].          |
| 20 | Text 19 + 4 days with PDC $\leq$ 75% | 4 days | When you [cue], remember to take your medication.                             |
| 21 | Text 20 + 4 days with PDC $\leq$ 75% | 4 days | You put your medication [location]. Don't forget to take them when you [cue]. |
| 22 | Text 21 + 4 days with PDC $\leq$ 75% | 4 days | Remember to take your medication when you are [same cue or new cue].          |
| 23 | Text 22 + 4 days with PDC $\leq$ 75% | 4 days | When you [cue], remember to take your medication.                             |
