# Supplementary figures and images for: Randomised controlled trial targeting habit formation to improve medication adherence to daily oral medications in patients with gout
Source: HighWire-hosted journal article supplement (doi:10.1136/bmjopen-2021-055930), 2021-11-01

## Charity Sticker

- **Greater Boston Food Bank**

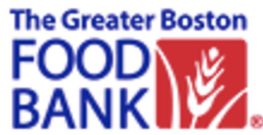

- **Animal Rescue League**

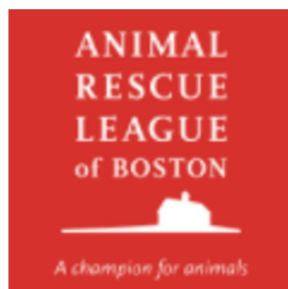

- **UNICEF**

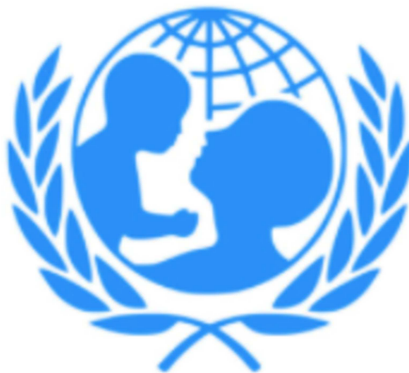

Supplement: bmjopen-2021-055930supp003_data_supplement.pdf [file bmjopen-2021-055930supp003_data_supplement.pdf]
